# Supplementary material
Source: publisher site journal article supplement (https://www.spandidos-publications.com/6135/downloadSupplementary)
Supplement: Supplementary file 1 [file downloadSupplementary]

## Sheet: Sheet1
Table SI. Extracellular cancer-associated fibroblasts risk scores and clinical data of the 5 patients in the present study.
Characteristic	10_P1_SCC	10_P2_SCC	10_P3_SCC	10_P4_SCC	10_P5_SCC
Gene name
HSPG2	2.56789	0	0.554129	1.41634	1.22188
LEPROT	3.09658	0.424628	3.10194	1.78223	2.16417
LEPR	0.220662	0	1.6216	1.42776	0.0840336
LMO4	1.81726	1.37735	2.87521	2.85233	1.61769
VCAM1	2.49588	0.254323	1.0335	1.52804	1.26745
PTGS2	0.0459263	0	0.586044	0.432204	0.265785
TMEM9	0.956495	0	0.607158	0.366756	0.212039
COL4A1	4.22146	0.283086	2.45251	2.42098	2.65696
NDRG2	0.616543	0	0.800664	0.308798	0.235904
EGLN3	0.41484	0	0.684603	0.350953	0.148427
SEC23A	1.12644	0.952426	0.523175	1.15689	1.16881
RGS5	0.0968429	0	5.33657	0.807659	0
Risk score	1.75936	0.0569184	0.648927	0.924318	0.952008
Sex	Female	Female	Female	Female	Female
Age, years	63	67	56	48	65
FIGO stage	IIIC1p	IIA1	IB2	IB1	IIIC1p
Histological type	Squamous cervical cancer	Squamous cervical cancer	Squamous cervical cancer	Squamous cervical cancer	Squamous cervical cancer
Metastasis	Yes	No	No	No	Yes
SCC, squamous cell carcinoma; FIGO, Federation of Gynecology and Obstetrics.
